# Supplementary material
Source: PubMed Central journal article supplement (PMC5217374)
Supplement: proteomes-03-00056-s001.pdf [file proteomes-03-00056-s001.pdf]

## Supplementary Materials

**Table 1.** Identification of streptavidin enriched biotinylated proteins from brain of 17 week-old C57BL/6J mice exposed to 0, 0.1 or 4 Gy of <sup>137</sup>Cs  $\gamma$ -rays 13 days earlier. Equal mass aliquots of protein lysates from 5 different mice in each group were combined, modified by the biotin switch assay, and submitted for mass spectrometry analyses.

| Protein Descriptions                                                                                              | Protein Name (Swissprot) | Molecular Weight | Quantitative Value |        |       |
|-------------------------------------------------------------------------------------------------------------------|--------------------------|------------------|--------------------|--------|-------|
|                                                                                                                   |                          |                  | 0 cGy              | 0.1 Gy | 4 Gy  |
| 14-3-3 protein gamma OS = Mus musculus<br>GN = Ywhag PE = 1 SV = 2                                                | 1433G_MOUSE              | 28 kDa           | 4.69               | 7.01   | 4.64  |
| 14-3-3 protein zeta/delta OS = Mus musculus<br>GN = Ywhaz PE = 1 SV = 1                                           | 1433Z_MOUSE              | 28 kDa           | 14.06              | 12.85  | 10.21 |
| 1-phosphatidylinositol 4,5-bisphosphate<br>phosphodiesterase beta-1 OS = Mus musculus<br>GN = Plcb1 PE = 1 SV = 2 | PLCB1_MOUSE              | 138 kDa          | 4.69               | 4.67   | 1.86  |
| 2',3'-cyclic-nucleotide 3'-phosphodiesterase<br>OS = Mus musculus GN = Cnp PE = 1 SV = 3                          | CN37_MOUSE               | 47 kDa           | 6.56               | 5.84   | 11.14 |
| 2-oxoglutarate dehydrogenase, mitochondrial<br>OS = Mus musculus GN = Ogdh PE = 1 SV = 3                          | ODO1_MOUSE               | 116 kDa          | 3.75               | 4.67   | 4.64  |
| 3-hydroxyisobutyrate dehydrogenase, mitochondrial<br>OS = Mus musculus GN = Hibadh PE = 2 SV = 1                  | 3HIDH_MOUSE              | 35 kDa           | 0.94               | 4.67   | 0.93  |
| 3-hydroxyisobutyryl-CoA hydrolase, mitochondrial<br>OS = Mus musculus GN = Hibch PE = 1 SV = 1                    | HIBCH_MOUSE              | 43 kDa           | 0.00               | 1.17   | 3.71  |
| 3-mercaptopyruvate sulfurtransferase OS = Mus<br>musculus GN = Mpst PE = 1 SV = 3                                 | THTM_MOUSE               | 33 kDa           | 5.62               | 4.67   | 3.71  |
| 40S ribosomal protein S10 OS = Mus musculus<br>GN = Rps10 PE = 1 SV = 1                                           | RS10_MOUSE               | 19 kDa           | 6.56               | 5.84   | 3.71  |
| 40S ribosomal protein S2 OS = Mus musculus<br>GN = Rps2 PE = 1 SV = 3                                             | RS2_MOUSE                | 31 kDa           | 2.81               | 2.34   | 3.71  |
| 40S ribosomal protein S3a OS = Mus musculus<br>GN = Rps3a PE = 1 SV = 3                                           | RS3A_MOUSE               | 30 kDa           | 1.87               | 4.67   | 0.00  |
| 4-aminobutyrate aminotransferase, mitochondrial<br>OS = Mus musculus GN = Abat PE = 1 SV = 1                      | GABT_MOUSE               | 56 kDa           | 13.12              | 16.35  | 12.07 |
| 4F2 cell-surface antigen heavy chain OS = Mus<br>musculus GN = Slc3a2 PE = 1 SV = 1                               | 4F2_MOUSE                | 58 kDa           | 3.75               | 3.50   | 2.79  |
| 5'-nucleotidase domain-containing protein 3<br>OS = Mus musculus GN = Nt5dc3 PE = 2 SV = 1                        | NT5D3_MOUSE              | 63 kDa           | 3.75               | 3.50   | 3.71  |
| 60 kDa heat shock protein, mitochondrial<br>OS = Mus musculus GN = Hspd1 PE = 1 SV = 1                            | CH60_MOUSE               | 61 kDa           | 2.81               | 1.17   | 0.00  |
| 60S ribosomal protein L5 OS = Mus musculus<br>GN = Rpl5 PE = 1 SV = 3                                             | RL5_MOUSE                | 34 kDa           | 3.75               | 3.50   | 4.64  |
| 6-phosphofructokinase, liver type OS = Mus<br>musculus GN = Pfk1 PE = 1 SV = 4                                    | K6PL_MOUSE               | 85 kDa           | 3.75               | 0.00   | 5.57  |
| 6-phosphofructokinase, muscle type OS = Mus<br>musculus GN = Pfk1 PE = 1 SV = 3                                   | K6PF_MOUSE               | 85 kDa           | 6.56               | 2.34   | 7.43  |
| Aconitate hydratase, mitochondrial OS = Mus<br>musculus GN = Aco2 PE = 1 SV = 1                                   | ACON_MOUSE               | 85 kDa           | 8.44               | 5.84   | 13.00 |

Table S1. Cont.

| Protein Descriptions                                                                         | Protein Name (Swissprot) | Molecular Weight | Quantitative Value |        |        |
|----------------------------------------------------------------------------------------------|--------------------------|------------------|--------------------|--------|--------|
|                                                                                              |                          |                  | 0 cGy              | 0.1 Gy | 4 Gy   |
| Actin, cytoplasmic 1 OS = Mus musculus<br>GN = Actb PE = 1 SV = 1                            | ACTB_MOUSE (+1)          | 42 kDa           | 68.43              | 73.59  | 56.63  |
| Actin-related protein 2 OS = Mus musculus<br>GN = Actr2 PE = 1 SV = 1                        | ARP2_MOUSE               | 45 kDa           | 17.81              | 17.52  | 18.57  |
| Actin-related protein 2/3 complex subunit 2<br>OS = Mus musculus GN = Arpc2 PE = 1 SV = 3    | ARPC2_MOUSE              | 34 kDa           | 1.87               | 9.35   | 1.86   |
| Actin-related protein 2/3 complex subunit 4<br>OS = Mus musculus GN = Arpc4 PE = 1 SV = 3    | ARPC4_MOUSE              | 20 kDa           | 6.56               | 15.19  | 9.28   |
| Actin-related protein 3 OS = Mus musculus<br>GN = Actr3 PE = 1 SV = 3                        | ARP3_MOUSE               | 47 kDa           | 12.19              | 10.51  | 16.71  |
| Actin-related protein 3B OS = Mus musculus<br>GN = Actr3b PE = 2 SV = 1                      | ARP3B_MOUSE              | 48 kDa           | 10.31              | 10.51  | 14.85  |
| Active breakpoint cluster region-related protein<br>OS = Mus musculus GN = Abr PE = 2 SV = 1 | ABR_MOUSE                | 98 kDa           | 1.87               | 0.00   | 2.79   |
| Adapter molecule crk OS = Mus musculus<br>GN = Crk PE = 1 SV = 1                             | CRK_MOUSE                | 34 kDa           | 2.81               | 4.67   | 3.71   |
| Adenylate kinase isoenzyme 1 OS = Mus musculus<br>GN = Ak1 PE = 1 SV = 1                     | KAD1_MOUSE               | 22 kDa           | 3.75               | 1.17   | 1.86   |
| ADP/ATP translocase 1 OS = Mus musculus<br>GN = Slc25a4 PE = 1 SV = 4                        | ADT1_MOUSE               | 33 kDa           | 30.00              | 47.89  | 37.14  |
| ADP/ATP translocase 2 OS = Mus musculus<br>GN = Slc25a5 PE = 1 SV = 3                        | ADT2_MOUSE               | 33 kDa           | 27.18              | 31.54  | 24.14  |
| ADP-ribosylation factor 5 OS = Mus musculus<br>GN = Arf5 PE = 2 SV = 2                       | ARF5_MOUSE               | 21 kDa           | 108.74             | 115.64 | 150.40 |
| Alanine--tRNA ligase, cytoplasmic OS = Mus<br>musculus GN = Aars PE = 1 SV = 1               | SYAC_MOUSE               | 107 kDa          | 0.94               | 2.34   | 0.93   |
| Aldose reductase OS = Mus musculus<br>GN = Akr1b1 PE = 1 SV = 3                              | ALDR_MOUSE               | 36 kDa           | 4.69               | 0.00   | 4.64   |
| Alpha-actinin-4 OS = Mus musculus GN = Actn4<br>PE = 1 SV = 1                                | ACTN4_MOUSE              | 105 kDa          | 7.50               | 7.01   | 3.71   |
| Alpha-adducin OS = Mus musculus GN = Add1<br>PE = 1 SV = 2                                   | ADDA_MOUSE               | 81 kDa           | 3.75               | 5.84   | 2.79   |
| Alpha-enolase OS = Mus musculus GN = Eno1<br>PE = 1 SV = 3                                   | ENOA_MOUSE               | 47 kDa           | 51.56              | 35.04  | 29.71  |
| Alpha-internexin OS = Mus musculus GN = Ina<br>PE = 1 SV = 2                                 | AINX_MOUSE               | 56 kDa           | 3.75               | 0.00   | 1.86   |
| Alpha-synuclein OS = Mus musculus GN = Snca<br>PE = 1 SV = 2                                 | SYUA_MOUSE               | 14 kDa           | 3.75               | 0.00   | 1.86   |
| Ankyrin-2 OS = Mus musculus GN = Ank2<br>PE = 1 SV = 2                                       | ANK2_MOUSE               | 426 kDa          | 1.87               | 3.50   | 1.86   |
| Annexin A2 OS = Mus musculus GN = Anxa2<br>PE = 1 SV = 2                                     | ANXA2_MOUSE              | 39 kDa           | 2.81               | 0.00   | 0.00   |

Table S1. Cont.

| Protein Descriptions                                                                     | Protein Name (Swissprot) | Molecular Weight | Quantitative Value |        |       |
|------------------------------------------------------------------------------------------|--------------------------|------------------|--------------------|--------|-------|
|                                                                                          |                          |                  | 0 cGy              | 0.1 Gy | 4 Gy  |
| AP-1 complex subunit mu-1 OS = Mus musculus<br>GN = Ap1m1 PE = 1 SV = 3                  | AP1M1_MOUSE              | 49 kDa           | 5.62               | 0.00   | 2.79  |
| AP-2 complex subunit alpha-1 OS = Mus musculus<br>GN = Ap2a1 PE = 1 SV = 1               | AP2A1_MOUSE              | 108 kDa          | 8.44               | 5.84   | 13.93 |
| AP-2 complex subunit alpha-2 OS = Mus musculus<br>GN = Ap2a2 PE = 1 SV = 2               | AP2A2_MOUSE              | 104 kDa          | 8.44               | 11.68  | 11.14 |
| AP-2 complex subunit beta OS = Mus musculus<br>GN = Ap2b1 PE = 1 SV = 1                  | AP2B1_MOUSE              | 105 kDa          | 7.50               | 7.01   | 13.00 |
| AP-2 complex subunit mu OS = Mus musculus<br>GN = Ap2m1 PE = 1 SV = 1                    | AP2M1_MOUSE              | 50 kDa           | 10.31              | 7.01   | 8.36  |
| AP-2 complex subunit sigma OS = Mus musculus<br>GN = Ap2s1 PE = 1 SV = 1                 | AP2S1_MOUSE              | 17 kDa           | 6.56               | 4.67   | 5.57  |
| Aspartate aminotransferase, cytoplasmic<br>OS = Mus musculus GN = Got1 PE = 1 SV = 3     | AATC_MOUSE               | 46 kDa           | 32.81              | 46.73  | 27.85 |
| Aspartate aminotransferase, mitochondrial<br>OS = Mus musculus GN = Got2 PE = 1 SV = 1   | AATM_MOUSE               | 47 kDa           | 12.19              | 12.85  | 11.14 |
| Atlastin-1 OS = Mus musculus GN = At11 PE = 1<br>SV = 1                                  | ATLA1_MOUSE              | 63 kDa           | 7.50               | 4.67   | 5.57  |
| ATP synthase subunit alpha, mitochondrial<br>OS = Mus musculus GN = Atp5a1 PE = 1 SV = 1 | ATPA_MOUSE               | 60 kDa           | 34.68              | 49.06  | 38.99 |
| ATP synthase subunit b, mitochondrial OS = Mus<br>musculus GN = Atp5f1 PE = 1 SV = 1     | AT5F1_MOUSE              | 29 kDa           | 25.31              | 33.88  | 25.07 |
| ATP synthase subunit beta, mitochondrial OS = Mus<br>musculus GN = Atp5b PE = 1 SV = 2   | ATPB_MOUSE               | 56 kDa           | 31.87              | 18.69  | 25.07 |
| ATP synthase subunit d, mitochondrial OS = Mus<br>musculus GN = Atp5h PE = 1 SV = 3      | ATP5H_MOUSE              | 19 kDa           | 10.31              | 0.00   | 12.07 |
| ATP synthase subunit gamma, mitochondrial<br>OS = Mus musculus GN = Atp5c1 PE = 1 SV = 1 | ATPG_MOUSE               | 33 kDa           | 15.00              | 7.01   | 15.78 |
| Band 4.1-like protein 3 OS = Mus musculus<br>GN = Epb4113 PE = 1 SV = 1                  | E41L3_MOUSE              | 103 kDa          | 5.62               | 2.34   | 3.71  |
| Beta-actin-like protein 2 OS = Mus musculus<br>GN = Actbl2 PE = 1 SV = 1                 | ACTBL_MOUSE              | 42 kDa           | 26.25              | 16.35  | 23.21 |
| Beta-adducin OS = Mus musculus GN = Add2<br>PE = 1 SV = 4                                | ADDB_MOUSE               | 81 kDa           | 1.87               | 0.00   | 0.93  |
| Beta-adrenergic receptor kinase 1 OS = Mus<br>musculus GN = Adrbk1 PE = 2 SV = 2         | ARBK1_MOUSE              | 80 kDa           | 1.87               | 2.34   | 2.79  |
| Beta-centractin OS = Mus musculus GN = Actr1b<br>PE = 1 SV = 1                           | ACTY_MOUSE (+1)          | 42 kDa           | 5.62               | 4.67   | 5.57  |
| Beta-hexosaminidase subunit beta OS = Mus<br>musculus GN = Hexb PE = 2 SV = 2            | HEXB_MOUSE               | 61 kDa           | 1.87               | 3.50   | 2.79  |
| Beta-soluble NSF attachment protein OS = Mus<br>musculus GN = Napb PE = 1 SV = 2         | SNAB_MOUSE               | 34 kDa           | 5.62               | 1.17   | 5.57  |

Table S1. Cont.

| Protein Descriptions                                                                                                       | Protein Name (Swissprot) | Molecular Weight | Quantitative Value |        |       |
|----------------------------------------------------------------------------------------------------------------------------|--------------------------|------------------|--------------------|--------|-------|
|                                                                                                                            |                          |                  | 0 cGy              | 0.1 Gy | 4 Gy  |
| Beta-synuclein OS = Mus musculus GN = Sncb<br>PE = 1 SV = 1                                                                | SYUB_MOUSE               | 14 kDa           | 3.75               | 5.84   | 3.71  |
| Brain protein 44 OS = Mus musculus GN = Brp44<br>PE = 1 SV = 1                                                             | BR44_MOUSE               | ?                | 6.56               | 4.67   | 4.64  |
| Brevican core protein OS = Mus musculus<br>GN = Bean PE = 1 SV = 2                                                         | PGCB_MOUSE               | 96 kDa           | 1.87               | 2.34   | 3.71  |
| BTB/POZ domain-containing protein 17<br>OS = Mus musculus GN = Btbd17 PE = 2 SV = 1                                        | BTBDH_MOUSE              | 53 kDa           | 2.81               | 2.34   | 2.79  |
| BTB/POZ domain-containing protein KCTD16<br>OS = Mus musculus GN = Kctd16 PE = 1 SV = 2                                    | KCD16_MOUSE              | 49 kDa           | 3.75               | 7.01   | 3.71  |
| Calcium/calmodulin-dependent 3',5'-cyclic<br>nucleotide phosphodiesterase 1A OS = Mus<br>musculus GN = Pde1a PE = 2 SV = 2 | PDE1A_MOUSE (+1)         | 65 kDa           | 3.75               | 2.34   | 0.00  |
| Calcium/calmodulin-dependent protein kinase type II<br>subunit alpha OS = Mus musculus<br>GN = Camk2a PE = 1 SV = 2        | KCC2A_MOUSE              | 54 kDa           | 41.25              | 78.26  | 58.49 |
| Calcium/calmodulin-dependent protein kinase type II<br>subunit beta OS = Mus musculus<br>GN = Camk2b PE = 1 SV = 2         | KCC2B_MOUSE              | 60 kDa           | 9.37               | 7.01   | 6.50  |
| Calcium/calmodulin-dependent protein kinase type II<br>subunit delta OS = Mus musculus<br>GN = Camk2d PE = 1 SV = 1        | KCC2D_MOUSE              | 56 kDa           | 6.56               | 4.67   | 1.86  |
| Calcium-activated potassium channel subunit alpha-1<br>OS = Mus musculus GN = Kcma1<br>PE = 1 SV = 2                       | KCMA1_MOUSE              | 134 kDa          | 3.75               | 8.18   | 6.50  |
| Calcium-binding mitochondrial carrier protein<br>Aralar1 OS = Mus musculus GN = Slc25a12<br>PE = 1 SV = 1                  | CMC1_MOUSE               | 75 kDa           | 9.37               | 9.35   | 11.14 |
| Calcium-dependent secretion activator 1<br>OS = Mus musculus GN = Cadps PE = 1 SV = 3                                      | CAPS1_MOUSE              | 153 kDa          | 11.25              | 25.70  | 13.00 |
| Calmodulin OS = Mus musculus GN = Calm1<br>PE = 1 SV = 2                                                                   | CALM_MOUSE               | 17 kDa           | 1.87               | 0.00   | 1.86  |
| Calreticulin OS = Mus musculus GN = Calr<br>PE = 1 SV = 1                                                                  | CALR_MOUSE               | 48 kDa           | 10.31              | 1.17   | 6.50  |
| cAMP-dependent protein kinase catalytic subunit<br>alpha OS = Mus musculus GN = Prkaca PE = 1 SV = 3                       | KAPCA_MOUSE (+1)         | 41 kDa           | 3.75               | 8.18   | 0.00  |
| Carbonic anhydrase 2 OS = Mus musculus<br>GN = Ca2 PE = 1 SV = 4                                                           | CAH2_MOUSE               | 29 kDa           | 7.50               | 7.01   | 5.57  |
| Casein kinase II subunit alpha' OS = Mus musculus<br>GN = Csnk2a2 PE = 2 SV = 1                                            | CSK22_MOUSE              | 41 kDa           | 0.00               | 3.50   | 2.79  |
| Cathepsin B OS = Mus musculus GN = Ctsb<br>PE = 1 SV = 2                                                                   | CATB_MOUSE               | 37 kDa           | 6.56               | 3.50   | 5.57  |

Table S1. Cont.

| Protein Descriptions                                                                                      | Protein Name (Swissprot) | Molecular Weight | Quantitative Value |        |       |
|-----------------------------------------------------------------------------------------------------------|--------------------------|------------------|--------------------|--------|-------|
|                                                                                                           |                          |                  | 0 cGy              | 0.1 Gy | 4 Gy  |
| Cell adhesion molecule 3 OS = Mus musculus<br>GN = Cadm3 PE = 1 SV = 1                                    | CADM3_MOUSE              | 43 kDa           | 1.87               | 0.00   | 1.86  |
| Cell division control protein 42 homolog<br>OS = Mus musculus GN = Cdc42 PE = 1 SV = 2                    | CDC42_MOUSE              | 21 kDa           | 3.75               | 2.34   | 3.71  |
| Citrate synthase, mitochondrial OS = Mus musculus<br>GN = Cs PE = 1 SV = 1                                | CISY_MOUSE               | 52 kDa           | 17.81              | 36.21  | 21.35 |
| Clathrin coat assembly protein AP180 OS = Mus<br>musculus GN = Snap91 PE = 1 SV = 1                       | AP180_MOUSE              | 92 kDa           | 15.94              | 7.01   | 9.28  |
| Clathrin heavy chain 1 OS = Mus musculus<br>GN = Cltc PE = 1 SV = 3                                       | CLH_MOUSE                | ?                | 54.37              | 74.76  | 69.63 |
| Cofilin-1 OS = Mus musculus GN = Cfl1 PE = 1 SV = 3                                                       | COF1_MOUSE               | 19 kDa           | 11.25              | 9.35   | 10.21 |
| Cofilin-2 OS = Mus musculus GN = Cfl2 PE = 1 SV = 1                                                       | COF2_MOUSE               | 19 kDa           | 4.69               | 4.67   | 3.71  |
| Contactin-1 OS = Mus musculus GN = Cntn1<br>PE = 1 SV = 1                                                 | CNTN1_MOUSE              | 113 kDa          | 4.69               | 3.50   | 6.50  |
| Contactin-associated protein 1 OS = Mus musculus<br>GN = Cntnap1 PE = 1 SV = 2                            | CNTP1_MOUSE              | 156 kDa          | 0.94               | 0.00   | 3.71  |
| Contactin-associated protein-like 2 OS = Mus<br>musculus GN = Cntnap2 PE = 1 SV = 2                       | CNTP2_MOUSE              | 148 kDa          | 5.62               | 5.84   | 5.57  |
| Coronin-1C OS = Mus musculus GN = Coro1c<br>PE = 1 SV = 2                                                 | COR1C_MOUSE              | 53 kDa           | 1.87               | 0.00   | 3.71  |
| Creatine kinase B-type OS = Mus musculus<br>GN = Ckb PE = 1 SV = 1                                        | KCRB_MOUSE               | 43 kDa           | 37.50              | 78.26  | 36.21 |
| Creatine kinase U-type, mitochondrial OS = Mus<br>musculus GN = Ckmt1 PE = 1 SV = 1                       | KCRU_MOUSE               | 47 kDa           | 30.00              | 18.69  | 39.92 |
| C-terminal-binding protein 1 OS = Mus musculus<br>GN = Ctbp1 PE = 1 SV = 2                                | CTBP1_MOUSE              | 48 kDa           | 0.00               | 0.00   | 2.79  |
| Cullin-associated NEDD8-dissociated protein 1<br>OS = Mus musculus GN = Cand1 PE = 2 SV = 2               | CAND1_MOUSE              | 136 kDa          | 0.94               | 4.67   | 1.86  |
| Cytochrome b-c1 complex subunit 1, mitochondrial<br>OS = Mus musculus GN = Uqerc1 PE = 1 SV = 2           | QCR1_MOUSE               | 53 kDa           | 12.19              | 14.02  | 17.64 |
| Cytochrome b-c1 complex subunit 2, mitochondrial<br>OS = Mus musculus GN = Uqerc2 PE = 1 SV = 1           | QCR2_MOUSE               | 48 kDa           | 0.00               | 2.34   | 1.86  |
| Cytochrome c oxidase subunit 2 OS = Mus musculus<br>GN = MtcO2 PE = 1 SV = 1                              | COX2_MOUSE               | 26 kDa           | 1.87               | 4.67   | 3.71  |
| Cytochrome c oxidase subunit 4 isoform 1,<br>mitochondrial OS = Mus musculus GN = Cox4i1<br>PE = 1 SV = 2 | COX41_MOUSE              | 20 kDa           | 1.87               | 0.00   | 3.71  |
| Cytochrome c oxidase subunit 6B1 OS = Mus<br>musculus GN = Cox6b1 PE = 1 SV = 2                           | CX6B1_MOUSE              | 10 kDa           | 8.44               | 14.02  | 10.21 |
| Cytochrome c1, heme protein, mitochondrial<br>OS = Mus musculus GN = Cyc1 PE = 1 SV = 1                   | CY1_MOUSE                | 35 kDa           | 10.31              | 10.51  | 9.28  |
| Cytoplasmic dynein 1 heavy chain 1 OS = Mus<br>musculus GN = Dync1h1 PE = 1 SV = 2                        | DYHC1_MOUSE              | 532 kDa          | 2.81               | 11.68  | 11.14 |

Table S1. Cont.

| Protein Descriptions                                                                                                                                      | Protein Name (Swissprot) | Molecular Weight | Quantitative Value |        |       |
|-----------------------------------------------------------------------------------------------------------------------------------------------------------|--------------------------|------------------|--------------------|--------|-------|
|                                                                                                                                                           |                          |                  | 0 cGy              | 0.1 Gy | 4 Gy  |
| Cytoplasmic dynein 1 light intermediate chain 2 OS<br>= Mus musculus GN = Dync1li2 PE = 1 SV = 2                                                          | DC1L2_MOUSE              | 54 kDa           | 1.87               | 5.84   | 3.71  |
| Cytoplasmic FMR1-interacting protein 1 OS = Mus<br>musculus GN = Cyfip1 PE = 1 SV = 1                                                                     | CYFP1_MOUSE              | 145 kDa          | 1.87               | 0.00   | 2.79  |
| Cytoplasmic FMR1-interacting protein 2 OS = Mus<br>musculus GN = Cyfip2 PE = 1 SV = 2                                                                     | CYFP2_MOUSE              | 146 kDa          | 0.00               | 0.00   | 5.57  |
| Cytosol aminopeptidase OS = Mus musculus<br>GN = Lap3 PE = 1 SV = 3                                                                                       | AMPL_MOUSE               | 56 kDa           | 2.81               | 4.67   | 3.71  |
| Cytosolic 10-formyltetrahydrofolate dehydrogenase<br>OS = Mus musculus GN = Aldh1l1 PE = 2 SV = 1                                                         | AL1L1_MOUSE              | 99 kDa           | 5.62               | 4.67   | 5.57  |
| D-beta-hydroxybutyrate dehydrogenase,<br>mitochondrial OS = Mus musculus GN = Bdh1<br>PE = 1 SV = 2                                                       | BDH_MOUSE                | 38 kDa           | 2.81               | 5.84   | 5.57  |
| D-dopachrome decarboxylase OS = Mus musculus<br>GN = Ddt PE = 1 SV = 3                                                                                    | DOPD_MOUSE               | 13 kDa           | 1.87               | 1.17   | 3.71  |
| Dihydropyridyllysine-residue acetyltransferase component<br>of pyruvate dehydrogenase complex, mitochondrial<br>OS = Mus musculus GN = Dlat PE = 1 SV = 2 | ODP2_MOUSE               | 68 kDa           | 1.87               | 0.00   | 0.00  |
| Dihydropyrimidinase-related protein 1 OS = Mus<br>musculus GN = Crmp1 PE = 1 SV = 1                                                                       | DPYL1_MOUSE              | 62 kDa           | 12.19              | 7.01   | 13.00 |
| Dihydropyrimidinase-related protein 2 OS = Mus<br>musculus GN = Dpysl2 PE = 1 SV = 2                                                                      | DPYL2_MOUSE              | 62 kDa           | 27.18              | 33.88  | 28.78 |
| Dihydropyrimidinase-related protein 4 OS = Mus<br>musculus GN = Dpysl4 PE = 1 SV = 1                                                                      | DPYL4_MOUSE              | 62 kDa           | 3.75               | 2.34   | 1.86  |
| Dipeptidyl aminopeptidase-like protein 6 OS = Mus<br>musculus GN = Dpp6 PE = 1 SV = 1                                                                     | DPP6_MOUSE               | 91 kDa           | 4.69               | 2.34   | 5.57  |
| Disintegrin and metalloproteinase domain-containing<br>protein 22 OS = Mus musculus GN = Adam22<br>PE = 1 SV = 2                                          | ADA22_MOUSE              | 100 kDa          | 0.00               | 1.17   | 2.79  |
| Disks large homolog 2 OS = Mus musculus<br>GN = Dlg2 PE = 1 SV = 2                                                                                        | DLG2_MOUSE               | 95 kDa           | 5.62               | 8.18   | 7.43  |
| Disks large homolog 4 OS = Mus musculus<br>GN = Dlg4 PE = 1 SV = 1                                                                                        | DLG4_MOUSE               | 80 kDa           | 5.62               | 4.67   | 9.28  |
| DmX-like protein 2 OS = Mus musculus<br>GN = Dmxl2 PE = 1 SV = 3                                                                                          | DMXL2_MOUSE              | 338 kDa          | 8.44               | 11.68  | 12.07 |
| DOMON domain-containing protein FRRS1L<br>OS = Mus musculus GN = Frs1l PE = 1 SV = 1                                                                      | FRS1L_MOUSE              | 33 kDa           | 2.81               | 0.00   | 0.00  |
| Double C2-like domain-containing protein alpha OS<br>= Mus musculus GN = Doc2a PE = 2 SV = 1                                                              | DOC2A_MOUSE              | 45 kDa           | 1.87               | 5.84   | 1.86  |
| Dynamin-1 OS = Mus musculus GN = Dnm1 PE = 1<br>SV = 2                                                                                                    | DYN1_MOUSE               | 98 kDa           | 25.31              | 29.20  | 29.71 |
| Dynamin-1-like protein OS = Mus musculus<br>GN = Dnm1l PE = 1 SV = 2                                                                                      | DNM1L_MOUSE              | 83 kDa           | 1.87               | 2.34   | 2.79  |

Table S1. Cont.

| Protein Descriptions                                                                                               | Protein Name (Swissprot) | Molecular Weight | Quantitative Value |        |       |
|--------------------------------------------------------------------------------------------------------------------|--------------------------|------------------|--------------------|--------|-------|
|                                                                                                                    |                          |                  | 0 cGy              | 0.1 Gy | 4 Gy  |
| Dynamin-like 120 kDa protein, mitochondrial<br>OS = Mus musculus GN = Opa1 PE = 1 SV = 1                           | OPA1_MOUSE               | 111 kDa          | 2.81               | 5.84   | 2.79  |
| E3 ubiquitin-protein ligase UBR4 OS = Mus<br>musculus GN = Ubr4 PE = 1 SV = 1                                      | UBR4_MOUSE               | 572 kDa          | 1.87               | 0.00   | 2.79  |
| EH domain-containing protein 1 OS = Mus musculus<br>GN = Ehd1 PE = 1 SV = 1                                        | EHD1_MOUSE (+1)          | 61 kDa           | 2.81               | 7.01   | 5.57  |
| Elongation factor 1-alpha 1 OS = Mus musculus<br>GN = Eef1a1 PE = 1 SV = 3                                         | EF1A1_MOUSE              | 50 kDa           | 15.00              | 11.68  | 15.78 |
| Elongation factor 1-alpha 2 OS = Mus musculus<br>GN = Eef1a2 PE = 1 SV = 1                                         | EF1A2_MOUSE              | 50 kDa           | 12.19              | 11.68  | 19.50 |
| Elongation factor 1-gamma OS = Mus musculus<br>GN = Eef1g PE = 1 SV = 3                                            | EF1G_MOUSE               | 50 kDa           | 6.56               | 2.34   | 3.71  |
| Elongation factor 2 OS = Mus musculus GN = Eef2<br>PE = 1 SV = 2                                                   | EF2_MOUSE                | 95 kDa           | 4.69               | 10.51  | 1.86  |
| Endophilin-B2 OS = Mus musculus GN = Sh3glb2<br>PE = 2 SV = 2                                                      | SHLB2_MOUSE              | 45 kDa           | 1.87               | 0.00   | 3.71  |
| Endoplasmic reticulum chaperone protein OS = Mus musculus<br>GN = Hsp90b1 PE = 1 SV = 2                            | ENPL_MOUSE               | 92 kDa           | 3.75               | 2.34   | 2.79  |
| Eukaryotic peptide chain release factor GTP-binding<br>subunit ERF3A OS = Mus musculus GN = Gspt1<br>PE = 1 SV = 2 | ERF3A_MOUSE              | 69 kDa           | 4.69               | 4.67   | 3.71  |
| Eukaryotic translation initiation factor 5A-1<br>OS = Mus musculus GN = Eif5a PE = 1 SV = 2                        | IF5A1_MOUSE              | 17 kDa           | 4.69               | 1.17   | 0.00  |
| Excitatory amino acid transporter 1 OS = Mus<br>musculus GN = Slc1a3 PE = 1 SV = 2                                 | EAA1_MOUSE               | 60 kDa           | 1.87               | 2.34   | 5.57  |
| Excitatory amino acid transporter 2 OS = Mus<br>musculus GN = Slc1a2 PE = 1 SV = 1                                 | EAA2_MOUSE               | 62 kDa           | 8.44               | 2.34   | 10.21 |
| F-actin-capping protein subunit beta OS = Mus<br>musculus GN = Capzb PE = 1 SV = 3                                 | CAPZB_MOUSE              | 31 kDa           | 5.62               | 0.00   | 5.57  |
| Fascin OS = Mus musculus GN = Fscn1 PE = 1<br>SV = 4                                                               | FSCN1_MOUSE              | 55 kDa           | 0.00               | 0.00   | 2.79  |
| Fatty acid synthase OS = Mus musculus GN = Fasn<br>PE = 1 SV = 2                                                   | FAS_MOUSE                | 272 kDa          | 1.87               | 3.50   | 3.71  |
| Fatty acid-binding protein, heart OS = Mus musculus<br>GN = Fabp3 PE = 1 SV = 5                                    | FABPH_MOUSE              | 15 kDa           | 4.69               | 0.00   | 4.64  |
| F-box/LRR-repeat protein 16 OS = Mus musculus<br>GN = Fbx16 PE = 2 SV = 1                                          | FXL16_MOUSE              | 52 kDa           | 0.00               | 0.00   | 3.71  |
| Formin-binding protein 1-like OS = Mus musculus<br>GN = Fnbp11 PE = 1 SV = 2                                       | FBP1L_MOUSE              | 70 kDa           | 2.81               | 2.34   | 3.71  |
| Fructose-bisphosphate aldolase A OS = Mus<br>musculus GN = Aldoa PE = 1 SV = 2                                     | ALDOA_MOUSE              | 39 kDa           | 4.69               | 3.50   | 5.57  |
| Fumarate hydratase, mitochondrial OS = Mus<br>musculus GN = Fh PE = 1 SV = 3                                       | FUMH_MOUSE               | 54 kDa           | 0.00               | 3.50   | 0.00  |

Table S1. Cont.

| Protein Descriptions                                                                        | Protein Name (Swissprot) | Molecular Weight | Quantitative Value |        |       |
|---------------------------------------------------------------------------------------------|--------------------------|------------------|--------------------|--------|-------|
|                                                                                             |                          |                  | 0 cGy              | 0.1 Gy | 4 Gy  |
| Gamma-enolase OS = Mus musculus GN = Eno2<br>PE = 1 SV = 2                                  | ENOG_MOUSE               | 47 kDa           | 64.68              | 31.54  | 31.57 |
| Glucose-6-phosphate 1-dehydrogenase X OS = Mus musculus GN = G6pdx PE = 1 SV = 3            | G6PD1_MOUSE              | 59 kDa           | 3.75               | 2.34   | 5.57  |
| Glucose-6-phosphate isomerase OS = Mus musculus GN = Gpi PE = 1 SV = 4                      | G6PI_MOUSE               | 63 kDa           | 7.50               | 7.01   | 4.64  |
| Glucosidase 2 subunit beta OS = Mus musculus GN = Prksh PE = 1 SV = 1                       | GLU2B_MOUSE              | 59 kDa           | 3.75               | 4.67   | 3.71  |
| Glutamate decarboxylase 2 OS = Mus musculus GN = Gad2 PE = 2 SV = 1                         | DCE2_MOUSE               | 65 kDa           | 3.75               | 0.00   | 4.64  |
| Glutamate dehydrogenase 1, mitochondrial OS = Mus musculus GN = Glud1 PE = 1 SV = 1         | DHE3_MOUSE               | 61 kDa           | 6.56               | 4.67   | 7.43  |
| Glutamate receptor ionotropic, NMDA 1 OS = Mus musculus GN = Grin1 PE = 1 SV = 1            | NMDZ1_MOUSE              | 105 kDa          | 1.87               | 0.00   | 2.79  |
| Glutamate receptor ionotropic, NMDA 2B OS = Mus musculus GN = Grin2b PE = 1 SV = 3          | NMDE2_MOUSE              | 166 kDa          | 1.87               | 1.17   | 3.71  |
| Glutaminase kidney isoform, mitochondrial OS = Mus musculus GN = Gls PE = 1 SV = 1          | GLSK_MOUSE               | 74 kDa           | 3.75               | 5.84   | 5.57  |
| Glutamine synthetase OS = Mus musculus GN = Glul PE = 1 SV = 6                              | GLNA_MOUSE               | 42 kDa           | 19.69              | 11.68  | 22.28 |
| Glutaredoxin-3 OS = Mus musculus GN = Glx3 PE = 1 SV = 1                                    | GLRX3_MOUSE              | 38 kDa           | 3.75               | 2.34   | 3.71  |
| Glutathione S-transferase Mu 1 OS = Mus musculus GN = Gstm1 PE = 1 SV = 2                   | GSTM1_MOUSE              | 26 kDa           | 3.75               | 8.18   | 3.71  |
| Glutathione S-transferase Mu 5 OS = Mus musculus GN = Gstm5 PE = 1 SV = 1                   | GSTM5_MOUSE              | 27 kDa           | 5.62               | 2.34   | 5.57  |
| Glyceraldehyde-3-phosphate dehydrogenase OS = Mus musculus GN = Gapdh PE = 1 SV = 2         | G3P_MOUSE                | 36 kDa           | 20.62              | 17.52  | 24.14 |
| Glycerol-3-phosphate dehydrogenase, mitochondrial OS = Mus musculus GN = Gpd2 PE = 1 SV = 2 | GPDM_MOUSE               | 81 kDa           | 3.75               | 5.84   | 4.64  |
| Glycogen phosphorylase, brain form OS = Mus musculus GN = Pygb PE = 1 SV = 3                | PYGB_MOUSE               | 97 kDa           | 6.56               | 9.35   | 9.28  |
| Glyoxalase domain-containing protein 4 OS = Mus musculus GN = Glod4 PE = 2 SV = 1           | GLOD4_MOUSE              | 33 kDa           | 3.75               | 5.84   | 4.64  |
| GMP synthase [glutamine-hydrolyzing] OS = Mus musculus GN = Gmps PE = 1 SV = 2              | GUAA_MOUSE               | 77 kDa           | 3.75               | 1.17   | 1.86  |
| GTP:AMP phosphotransferase AK3, mitochondrial OS = Mus musculus GN = Ak3 PE = 1 SV = 3      | KAD3_MOUSE               | 25 kDa           | 1.87               | 4.67   | 1.86  |
| GTP-binding nuclear protein Ran OS = Mus musculus GN = Ran PE = 1 SV = 3                    | RAN_MOUSE                | 24 kDa           | 3.75               | 7.01   | 4.64  |
| Guanine deaminase OS = Mus musculus GN = Gda PE = 1 SV = 1                                  | GUAD_MOUSE               | 51 kDa           | 1.87               | 3.50   | 1.86  |



**Table S1. Cont.**

| Protein Descriptions                                                                                       | Protein Name (Swissprot) | Molecular Weight | Quantitative Value |        |       |
|------------------------------------------------------------------------------------------------------------|--------------------------|------------------|--------------------|--------|-------|
|                                                                                                            |                          |                  | 0 cGy              | 0.1 Gy | 4 Gy  |
| Guanine nucleotide-binding protein G(i) subunit alpha-1 OS = Mus musculus GN = Gnai1 PE = 2 SV = 1         | GNAI1_MOUSE              | 40 kDa           | 9.37               | 7.01   | 7.43  |
| Guanine nucleotide-binding protein G(l)/G(S)/G(T) subunit beta-1 OS = Mus musculus GN = Gnb1 PE = 1 SV = 3 | GBB1_MOUSE               | 37 kDa           | 19.69              | 17.52  | 11.14 |
| Guanine nucleotide-binding protein G(l)/G(S)/G(T) subunit beta-2 OS = Mus musculus GN = Gnb2 PE = 1 SV = 3 | GBB2_MOUSE               | 37 kDa           | 17.81              | 17.52  | 7.43  |
| Guanine nucleotide-binding protein G(o) subunit alpha OS = Mus musculus GN = Gnao1 PE = 1 SV = 3           | GNAO_MOUSE               | 40 kDa           | 9.37               | 5.84   | 13.00 |
| Guanine nucleotide-binding protein G(q) subunit alpha OS = Mus musculus GN = Gnaq PE = 1 SV = 4            | GNAQ_MOUSE               | 42 kDa           | 1.87               | 8.18   | 0.00  |
| Heat shock 70 kDa protein 12A OS = Mus musculus GN = Hspa12a PE = 1 SV = 1                                 | HS12A_MOUSE              | 75 kDa           | 2.81               | 4.67   | 1.86  |
| Heat shock cognate 71 kDa protein OS = Mus musculus GN = Hspa8 PE = 1 SV = 1                               | HSP7C_MOUSE              | 71 kDa           | 48.74              | 66.58  | 72.41 |
| Heat shock protein HSP 90-alpha OS = Mus musculus GN = Hsp90aa1 PE = 1 SV = 4                              | HS90A_MOUSE              | 85 kDa           | 63.74              | 77.10  | 75.20 |
| Heat shock protein HSP 90-beta OS = Mus musculus GN = Hsp90ab1 PE = 1 SV = 3                               | HS90B_MOUSE              | 83 kDa           | 47.81              | 53.73  | 54.78 |
| Hemoglobin subunit alpha OS = Mus musculus GN = Hba PE = 1 SV = 2                                          | HBA_MOUSE                | 15 kDa           | 20.62              | 24.53  | 15.78 |
| Hemoglobin subunit beta-1 OS = Mus musculus GN = Hbb-b1 PE = 1 SV = 2                                      | HBB1_MOUSE               | 16 kDa           | 33.75              | 23.36  | 23.21 |
| Heterogeneous nuclear ribonucleoprotein A/B OS = Mus musculus GN = Hnrnpab PE = 1 SV = 1                   | ROAA_MOUSE               | 31 kDa           | 4.69               | 0.00   | 5.57  |
| Heterogeneous nuclear ribonucleoprotein A1 OS = Mus musculus GN = Hnrnpa1 PE = 1 SV = 2                    | ROA1_MOUSE               | 34 kDa           | 3.75               | 3.50   | 4.64  |
| Heterogeneous nuclear ribonucleoprotein A3 OS = Mus musculus GN = Hnrnpa3 PE = 1 SV = 1                    | ROA3_MOUSE               | 40 kDa           | 2.81               | 0.00   | 3.71  |
| Heterogeneous nuclear ribonucleoprotein D0 OS = Mus musculus GN = Hnrnpd PE = 1 SV = 2                     | HNRPD_MOUSE              | 38 kDa           | 3.75               | 0.00   | 5.57  |
| Heterogeneous nuclear ribonucleoprotein U OS = Mus musculus GN = Hnrnpu PE = 1 SV = 1                      | HNRPU_MOUSE              | 88 kDa           | 5.62               | 0.00   | 1.86  |
| Heterogeneous nuclear ribonucleoproteins A2/B1 OS = Mus musculus GN = Hnrnpa2b1 PE = 1 SV = 2              | ROA2_MOUSE               | 37 kDa           | 1.87               | 1.17   | 3.71  |
| Hexokinase-1 OS = Mus musculus GN = Hk1 PE = 1 SV = 3                                                      | HXK1_MOUSE               | 108 kDa          | 12.19              | 12.85  | 15.78 |
| Histidine triad nucleotide-binding protein 1 OS = Mus musculus GN = Hint1 PE = 1 SV = 3                    | HINT1_MOUSE              | 14 kDa           | 5.62               | 16.35  | 11.14 |

Table S1. Cont.

| Protein Descriptions                                                                                           | Protein Name (Swissprot) | Molecular Weight | Quantitative Value |        |      |
|----------------------------------------------------------------------------------------------------------------|--------------------------|------------------|--------------------|--------|------|
|                                                                                                                |                          |                  | 0 cGy              | 0.1 Gy | 4 Gy |
| Histone H2A type 2-A OS = Mus musculus<br>GN = Hist2h2aa1 PE = 1 SV = 3                                        | H2A2A_MOUSE (+1)         | 14 kDa           | 10.31              | 2.34   | 5.57 |
| Histone H4 OS = Mus musculus GN = Hist1h4a<br>PE = 1 SV = 2                                                    | H4_MOUSE                 | 11 kDa           | 8.44               | 2.34   | 5.57 |
| Homer protein homolog 1 OS = Mus musculus<br>GN = Homer1 PE = 1 SV = 2                                         | HOME1_MOUSE              | 41 kDa           | 5.62               | 7.01   | 7.43 |
| Hyaluronan and proteoglycan link protein 1<br>OS = Mus musculus GN = Hapln1 PE = 2 SV = 1                      | HPLN1_MOUSE              | 40 kDa           | 3.75               | 2.34   | 2.79 |
| Hypoxanthine-guanine phosphoribosyltransferase OS<br>= Mus musculus GN = Hpirt1 PE = 1 SV = 3                  | HPRT_MOUSE               | 25 kDa           | 2.81               | 1.17   | 3.71 |
| Hypoxia up-regulated protein 1 OS = Mus musculus<br>GN = Hyou1 PE = 1 SV = 1                                   | HYOU1_MOUSE              | 111 kDa          | 3.75               | 4.67   | 3.71 |
| Immunoglobulin superfamily member 8 OS = Mus<br>musculus GN = Igsf8 PE = 1 SV = 2                              | IGSF8_MOUSE              | 65 kDa           | 6.56               | 0.00   | 4.64 |
| Inactive dipeptidyl peptidase 10 OS = Mus musculus<br>GN = Dpp10 PE = 2 SV = 1                                 | DPP10_MOUSE              | 91 kDa           | 2.81               | 3.50   | 1.86 |
| Inositol 1,4,5-trisphosphate receptor type 1<br>OS = Mus musculus GN = Itpr1 PE = 1 SV = 2                     | ITPR1_MOUSE              | 313 kDa          | 1.87               | 8.18   | 4.64 |
| Isocitrate dehydrogenase [NAD] subunit alpha,<br>mitochondrial OS = Mus musculus GN = Idh3a<br>PE = 1 SV = 1   | IDH3A_MOUSE              | 40 kDa           | 4.69               | 2.34   | 6.50 |
| Isocitrate dehydrogenase [NAD] subunit gamma 1,<br>mitochondrial OS = Mus musculus GN = Idh3g<br>PE = 1 SV = 1 | IDHG1_MOUSE              | 43 kDa           | 7.50               | 15.19  | 7.43 |
| Isoleucine--tRNA ligase, mitochondrial OS = Mus<br>musculus GN = Iars2 PE = 2 SV = 1                           | SYIM_MOUSE               | 113 kDa          | 3.75               | 1.17   | 0.93 |
| Kinesin light chain 1 OS = Mus musculus GN = Klc1<br>PE = 1 SV = 3                                             | KLC1_MOUSE               | 61 kDa           | 1.87               | 0.00   | 3.71 |
| Lactoylglutathione lyase OS = Mus musculus<br>GN = Glo1 PE = 1 SV = 3                                          | LGUL_MOUSE               | 21 kDa           | 1.87               | 0.00   | 0.93 |
| Leukotriene A-4 hydrolase OS = Mus musculus GN<br>= Lta4h PE = 1 SV = 4                                        | LKHA4_MOUSE              | 69 kDa           | 1.87               | 3.50   | 2.79 |
| Limbic system-associated membrane protein<br>OS = Mus musculus GN = Lsamp PE = 1 SV = 1                        | LSAMP_MOUSE              | 38 kDa           | 2.81               | 0.00   | 1.86 |
| L-lactate dehydrogenase B chain OS = Mus<br>musculus GN = Ldhb PE = 1 SV = 2                                   | LDHB_MOUSE               | 37 kDa           | 8.44               | 2.34   | 5.57 |
| Long-chain-fatty-acid--CoA ligase ACSBG1<br>OS = Mus musculus GN = Acsbg1 PE = 1 SV = 1                        | ACBG1_MOUSE              | 80 kDa           | 1.87               | 2.34   | 2.79 |
| Malate dehydrogenase, cytoplasmic OS = Mus<br>musculus GN = Mdh1 PE = 1 SV = 3                                 | MDHC_MOUSE               | 37 kDa           | 8.44               | 4.67   | 6.50 |
| Malate dehydrogenase, mitochondrial OS = Mus<br>musculus GN = Mdh2 PE = 1 SV = 3                               | MDHM_MOUSE               | 36 kDa           | 7.50               | 2.34   | 9.28 |

Table S1. Cont.

| Protein Descriptions                                                                                                          | Protein Name (Swissprot) | Molecular Weight | Quantitative Value |        |       |
|-------------------------------------------------------------------------------------------------------------------------------|--------------------------|------------------|--------------------|--------|-------|
|                                                                                                                               |                          |                  | 0 cGy              | 0.1 Gy | 4 Gy  |
| MAP kinase-activating death domain protein<br>OS = Mus musculus GN = Madd PE = 1 SV = 2                                       | MADD_MOUSE               | 175 kDa          | 1.87               | 2.34   | 3.71  |
| Matrin-3 OS = Mus musculus GN = Matr3 PE = 1<br>SV = 1                                                                        | MATR3_MOUSE              | 95 kDa           | 1.87               | 4.67   | 1.86  |
| Membrane-associated guanylate kinase, WW and<br>PDZ domain-containing protein 2 OS = Mus<br>musculus GN = Magi2 PE = 1 SV = 2 | MAGI2_MOUSE              | 141 kDa          | 3.75               | 7.01   | 5.57  |
| Methylcrotonoyl-CoA carboxylase subunit alpha,<br>mitochondrial OS = Mus musculus GN = Mccc1 PE<br>= 2 SV = 2                 | MCCA_MOUSE               | 79 kDa           | 1.87               | 9.35   | 5.57  |
| Microsomal glutathione S-transferase 3 OS = Mus<br>musculus GN = Mgst3 PE = 1 SV = 1                                          | MGST3_MOUSE              | 17 kDa           | 2.81               | 2.34   | 2.79  |
| Microtubule-associated protein 2 OS = Mus<br>musculus GN = Map2 PE = 1 SV = 2                                                 | MAP2_MOUSE               | 199 kDa          | 0.00               | 0.00   | 2.79  |
| Microtubule-associated protein RP/EB family<br>member 3 OS = Mus musculus GN = Mapre3 PE = 1<br>SV = 1                        | MARE3_MOUSE              | 32 kDa           | 1.87               | 4.67   | 2.79  |
| Microtubule-associated protein tau OS = Mus<br>musculus GN = Mapt PE = 1 SV = 3                                               | TAU_MOUSE                | 76 kDa           | 9.37               | 3.50   | 5.57  |
| Mitochondrial 2-oxoglutarate/malate carrier protein<br>OS = Mus musculus GN = Slc25a11 PE = 1 SV = 3                          | M2OM_MOUSE               | 34 kDa           | 4.69               | 11.68  | 7.43  |
| Mitochondrial carrier homolog 2 OS = Mus<br>musculus GN = Mtch2 PE = 1 SV = 1                                                 | MTCH2_MOUSE              | 33 kDa           | 2.81               | 2.34   | 3.71  |
| Mitochondrial glutamate carrier 1 OS = Mus<br>musculus GN = Slc25a22 PE = 1 SV = 1                                            | GHC1_MOUSE               | 35 kDa           | 4.69               | 0.00   | 3.71  |
| Mitochondrial import receptor subunit TOM70<br>OS = Mus musculus GN = Tomm70a PE = 1 SV = 2                                   | TOM70_MOUSE              | 68 kDa           | 3.75               | 0.00   | 3.71  |
| Mitochondrial inner membrane protein OS = Mus<br>musculus GN = Immt PE = 1 SV = 1                                             | IMMT_MOUSE               | 84 kDa           | 3.75               | 2.34   | 2.79  |
| Monoglyceride lipase OS = Mus musculus<br>GN = Mgli PE = 1 SV = 1                                                             | MGLL_MOUSE               | 33 kDa           | 1.87               | 2.34   | 3.71  |
| MOSC domain-containing protein 2, mitochondrial<br>OS = Mus musculus GN = Marc2 PE = 1 SV = 1                                 | MOSC2_MOUSE              | 38 kDa           | 1.87               | 0.00   | 1.86  |
| Murinoglobulin-1 OS = Mus musculus GN = Mug1<br>PE = 1 SV = 3                                                                 | MUG1_MOUSE               | 165 kDa          | 5.62               | 2.34   | 4.64  |
| Myelin basic protein OS = Mus musculus GN = Mbp<br>PE = 1 SV = 2                                                              | MBP_MOUSE                | 27 kDa           | 4.69               | 2.34   | 7.43  |
| Myelin proteolipid protein OS = Mus musculus<br>GN = Plp1 PE = 1 SV = 2                                                       | MYPR_MOUSE               | 30 kDa           | 24.37              | 10.51  | 35.28 |
| Myelin-associated glycoprotein OS = Mus musculus<br>GN = Mag PE = 1 SV = 2                                                    | MAG_MOUSE                | 69 kDa           | 1.87               | 3.50   | 1.86  |
| Myoglobin OS = Mus musculus GN = Mb PE = 1<br>SV = 3                                                                          | MYG_MOUSE                | 17 kDa           | 2.81               | 4.67   | 3.71  |

Table S1. Cont.

| Protein Descriptions                                                                                                            | Protein Name (Swissprot) | Molecular Weight | Quantitative Value |        |       |
|---------------------------------------------------------------------------------------------------------------------------------|--------------------------|------------------|--------------------|--------|-------|
|                                                                                                                                 |                          |                  | 0 cGy              | 0.1 Gy | 4 Gy  |
| Myosin-10 OS = Mus musculus GN = Myh10 PE = 1<br>SV = 2                                                                         | MYH10_MOUSE              | 229 kDa          | 3.75               | 2.34   | 2.79  |
| Myosin-9 OS = Mus musculus GN = Myh9 PE = 1<br>SV = 4                                                                           | MYH9_MOUSE               | 226 kDa          | 8.44               | 4.67   | 3.71  |
| NADH dehydrogenase [ubiquinone] 1 alpha<br>subcomplex subunit 10, mitochondrial OS = Mus<br>musculus GN = Ndufa10 PE = 1 SV = 1 | NDUAA_MOUSE              | 41 kDa           | 1.87               | 3.50   | 4.64  |
| NADH dehydrogenase [ubiquinone] 1 alpha<br>subcomplex subunit 12 OS = Mus musculus<br>GN = Ndufa12 PE = 1 SV = 2                | NDUAC_MOUSE              | 17 kDa           | 2.81               | 0.00   | 1.86  |
| NADH dehydrogenase [ubiquinone] 1 alpha<br>subcomplex subunit 8 OS = Mus musculus<br>GN = Ndufa8 PE = 1 SV = 3                  | NDUA8_MOUSE              | 20 kDa           | 3.75               | 5.84   | 4.64  |
| NADH dehydrogenase [ubiquinone] 1 alpha<br>subcomplex subunit 9, mitochondrial OS = Mus<br>musculus GN = Ndufa9 PE = 1 SV = 2   | NDUA9_MOUSE              | 43 kDa           | 13.12              | 19.86  | 15.78 |
| NADH dehydrogenase [ubiquinone] 1 beta<br>subcomplex subunit 9 OS = Mus musculus<br>GN = Ndufb9 PE = 1 SV = 3                   | NDUB9_MOUSE              | 22 kDa           | 4.69               | 9.35   | 6.50  |
| NADH dehydrogenase [ubiquinone] flavoprotein 1,<br>mitochondrial OS = Mus musculus GN = Ndufv1<br>PE = 1 SV = 1                 | NDUV1_MOUSE              | 51 kDa           | 6.56               | 3.50   | 7.43  |
| NADH dehydrogenase [ubiquinone] iron-sulfur<br>protein 6, mitochondrial OS = Mus musculus<br>GN = Ndufs6 PE = 1 SV = 2          | NDUS6_MOUSE              | 13 kDa           | 1.87               | 0.00   | 3.71  |
| NADP-dependent malic enzyme, mitochondrial<br>OS = Mus musculus GN = Me3 PE = 1 SV = 2                                          | MAON_MOUSE               | 67 kDa           | 5.62               | 0.00   | 5.57  |
| Neural cell adhesion molecule 1 OS = Mus musculus<br>GN = Ncam1 PE = 1 SV = 3                                                   | NCAM1_MOUSE              | 119 kDa          | 4.69               | 1.17   | 11.14 |
| Neurobeachin OS = Mus musculus GN = Nbea<br>PE = 1 SV = 1                                                                       | NBEA_MOUSE               | 327 kDa          | 0.00               | 2.34   | 4.64  |
| Neurochondrin OS = Mus musculus GN = Ncdn<br>PE = 1 SV = 1                                                                      | NCDN_MOUSE               | 79 kDa           | 2.81               | 2.34   | 7.43  |
| Neurofilament light polypeptide OS = Mus musculus<br>GN = Nefl PE = 1 SV = 5                                                    | NFL_MOUSE                | 62 kDa           | 1.87               | 0.00   | 3.71  |
| Neuronal membrane glycoprotein M6-a OS = Mus<br>musculus GN = Gpm6a PE = 1 SV = 1                                               | GPM6A_MOUSE              | 31 kDa           | 5.62               | 1.17   | 5.57  |
| Neuron-specific calcium-binding protein hippocalcin<br>OS = Mus musculus GN = Hpea PE = 1 SV = 2                                | HPCA_MOUSE               | 22 kDa           | 5.62               | 2.34   | 4.64  |
| Neuroplastin OS = Mus musculus GN = Nptn PE = 1<br>SV = 3                                                                       | NPTN_MOUSE               | 44 kDa           | 2.81               | 4.67   | 6.50  |
| Neutral alpha-glucosidase AB OS = Mus musculus<br>GN = Ganab PE = 1 SV = 1                                                      | GANAB_MOUSE              | 107 kDa          | 0.00               | 5.84   | 1.86  |

Table S1. Cont.

| Protein Descriptions                                                                                                                           | Protein Name (Swissprot) | Molecular Weight | Quantitative Value |        |       |
|------------------------------------------------------------------------------------------------------------------------------------------------|--------------------------|------------------|--------------------|--------|-------|
|                                                                                                                                                |                          |                  | 0 cGy              | 0.1 Gy | 4 Gy  |
| Nocturnin OS = Mus musculus GN = Ccrn4l PE = 2<br>SV = 3                                                                                       | NOCT_MOUSE               | 48 kDa           | 3.75               | 1.17   | 0.00  |
| Nucleoside diphosphate kinase A OS = Mus musculus GN = Nme1 PE = 1 SV = 1                                                                      | NDKA_MOUSE               | 17 kDa           | 1.87               | 2.34   | 4.64  |
| OCIA domain-containing protein 2 OS = Mus musculus GN = Ociad2 PE = 2 SV = 1                                                                   | OCAD2_MOUSE              | 17 kDa           | 3.75               | 4.67   | 3.71  |
| Olfactory marker protein OS = Mus musculus GN = Omp PE = 1 SV = 3                                                                              | OMP_MOUSE                | 19 kDa           | 0.00               | 0.00   | 3.71  |
| Oxidation resistance protein 1 OS = Mus musculus GN = Oxr1 PE = 1 SV = 3                                                                       | OXR1_MOUSE               | 96 kDa           | 1.87               | 7.01   | 7.43  |
| Peptidyl-prolyl cis-trans isomerase A OS = Mus musculus GN = Ppia PE = 1 SV = 2                                                                | PPIA_MOUSE               | 18 kDa           | 35.62              | 14.02  | 30.64 |
| Peptidyl-prolyl cis-trans isomerase B OS = Mus musculus GN = Ppib PE = 2 SV = 2                                                                | PPIB_MOUSE               | 24 kDa           | 13.12              | 7.01   | 13.00 |
| Peptidyl-prolyl cis-trans isomerase FKBP4 OS = Mus musculus GN = Fkbp4 PE = 1 SV = 5                                                           | FKBP4_MOUSE              | 52 kDa           | 0.94               | 2.34   | 2.79  |
| Peptidyl-prolyl cis-trans isomerase NIMA-interacting 1 OS = Mus musculus GN = Pin1 PE = 1 SV = 1                                               | PIN1_MOUSE               | 18 kDa           | 2.81               | 2.34   | 3.71  |
| Peroxiredoxin-5, mitochondrial OS = Mus musculus GN = Prdx5 PE = 1 SV = 2                                                                      | PRDX5_MOUSE              | 22 kDa           | 3.75               | 0.00   | 3.71  |
| Peroxiredoxin-6 OS = Mus musculus GN = Prdx6 PE = 1 SV = 3                                                                                     | PRDX6_MOUSE              | 25 kDa           | 3.75               | 2.34   | 3.71  |
| Phosphate carrier protein, mitochondrial OS = Mus musculus GN = Slc25a3 PE = 1 SV = 1                                                          | MPCP_MOUSE               | 40 kDa           | 5.62               | 2.34   | 4.64  |
| Phosphatidylethanolamine-binding protein 1 OS = Mus musculus GN = Pebp1 PE = 1 SV = 3                                                          | PEBP1_MOUSE              | 21 kDa           | 6.56               | 1.17   | 2.79  |
| Phosphatidylinositol 3,4,5-trisphosphate 3-phosphatase and dual-specificity protein phosphatase PTEN OS = Mus musculus GN = Pten PE = 1 SV = 1 | PTEN_MOUSE               | 47 kDa           | 1.87               | 2.34   | 3.71  |
| Phosphatidylinositol 4-phosphate 5-kinase type-1 gamma OS = Mus musculus GN = Pip5k1c PE = 1 SV = 2                                            | PI51C_MOUSE              | 72 kDa           | 3.75               | 0.00   | 3.71  |
| Phosphatidylinositol transfer protein alpha isoform OS = Mus musculus GN = Pitpna PE = 1 SV = 2                                                | PIPNA_MOUSE              | 32 kDa           | 2.81               | 3.50   | 3.71  |
| Phosphofurin acidic cluster sorting protein 1 OS = Mus musculus GN = Pacs1 PE = 1 SV = 2                                                       | PACS1_MOUSE              | 105 kDa          | 3.75               | 4.67   | 6.50  |
| Phosphoglycerate kinase 1 OS = Mus musculus GN = Pgk1 PE = 1 SV = 4                                                                            | PGK1_MOUSE               | 45 kDa           | 3.75               | 5.84   | 5.57  |
| Phosphoglycerate mutase 1 OS = Mus musculus GN = Pgam1 PE = 1 SV = 3                                                                           | PGAM1_MOUSE              | 29 kDa           | 9.37               | 7.01   | 9.28  |
| PITH domain-containing protein 1 OS = Mus musculus GN = Pithd1 PE = 2 SV = 1                                                                   | PITH1_MOUSE              | 24 kDa           | 3.75               | 1.17   | 3.71  |

Table S1. Cont.

| Protein Descriptions                                                                                                 | Protein Name (Swissprot) | Molecular Weight | Quantitative Value |        |       |
|----------------------------------------------------------------------------------------------------------------------|--------------------------|------------------|--------------------|--------|-------|
|                                                                                                                      |                          |                  | 0 cGy              | 0.1 Gy | 4 Gy  |
| Plasma membrane calcium-transporting ATPase 2<br>OS = Mus musculus GN = Atp2b2 PE = 1 SV = 2                         | AT2B2_MOUSE              | 133 kDa          | 3.75               | 10.51  | 5.57  |
| Plectin OS = Mus musculus GN = Plect PE = 1<br>SV = 2                                                                | PLEC_MOUSE               | 534 kDa          | 6.56               | 4.67   | 7.43  |
| Probable phospholipid-transporting ATPase 1A<br>OS = Mus musculus GN = Atp8a1 PE = 1 SV = 1                          | AT8A1_MOUSE              | 130 kDa          | 8.44               | 8.18   | 7.43  |
| Probable ubiquitin carboxyl-terminal hydrolase<br>FAF-X OS = Mus musculus GN = Usp9x PE = 1 SV = 2                   | USP9X_MOUSE              | 291 kDa          | 6.56               | 3.50   | 7.43  |
| Profilin-1 OS = Mus musculus GN = Pfn1 PE = 1<br>SV = 2                                                              | PROF1_MOUSE              | 15 kDa           | 5.62               | 0.00   | 5.57  |
| Prohibitin OS = Mus musculus GN = Phb PE = 1<br>SV = 1                                                               | PHB_MOUSE                | 30 kDa           | 2.81               | 2.34   | 0.00  |
| Prolyl endopeptidase OS = Mus musculus GN = Prep<br>PE = 2 SV = 1                                                    | PPCE_MOUSE               | 81 kDa           | 3.75               | 0.00   | 5.57  |
| Propionyl-CoA carboxylase alpha chain,<br>mitochondrial OS = Mus musculus GN = Pcca<br>PE = 2 SV = 2                 | PCCA_MOUSE               | 80 kDa           | 0.00               | 0.00   | 2.79  |
| Prostaglandin E synthase 3 OS = Mus musculus GN<br>= Ptges3 PE = 1 SV = 1                                            | TEBP_MOUSE               | 19 kDa           | 3.75               | 3.50   | 3.71  |
| Proteasome subunit alpha type-2 OS = Mus musculus<br>GN = Psm2 PE = 1 SV = 3                                         | PSA2_MOUSE               | 26 kDa           | 6.56               | 3.50   | 5.57  |
| Protein bassoon OS = Mus musculus GN = Bsn<br>PE = 1 SV = 4                                                          | BSN_MOUSE                | 419 kDa          | 9.37               | 7.01   | 13.93 |
| Protein disulfide-isomerase A3 OS = Mus musculus<br>GN = Pdia3 PE = 1 SV = 2                                         | PDIA3_MOUSE              | 57 kDa           | 1.87               | 0.00   | 2.79  |
| Protein disulfide-isomerase OS = Mus musculus<br>GN = P4hb PE = 1 SV = 2                                             | PDIA1_MOUSE              | 57 kDa           | 1.87               | 4.67   | 3.71  |
| Protein kinase C and casein kinase substrate in<br>neurons protein 1 OS = Mus musculus GN = Pacsin1<br>PE = 1 SV = 1 | PACN1_MOUSE              | 51 kDa           | 22.50              | 37.38  | 27.85 |
| Protein kinase C gamma type OS = Mus musculus<br>GN = Prkcg PE = 1 SV = 1                                            | KPCG_MOUSE               | 78 kDa           | 8.44               | 1.17   | 5.57  |
| Protein NDRG2 OS = Mus musculus GN = Ndr2<br>PE = 1 SV = 1                                                           | NDRG2_MOUSE              | 41 kDa           | 3.75               | 5.84   | 2.79  |
| Protein phosphatase 1 regulatory subunit 29<br>OS = Mus musculus GN = Eifn2 PE = 1 SV = 1                            | PPR29_MOUSE              | 90 kDa           | 10.31              | 2.34   | 7.43  |
| Protein phosphatase 1E OS = Mus musculus<br>GN = Ppm1e PE = 1 SV = 2                                                 | PPM1E_MOUSE              | 83 kDa           | 2.81               | 0.00   | 3.71  |
| Putative ATP-dependent RNA helicase PI10<br>OS = Mus musculus GN = D1Pas1 PE = 1 SV = 1                              | DDX3L_MOUSE (+2)         | 73 kDa           | 2.81               | 2.34   | 2.79  |
| Putative tyrosine-protein phosphatase auxilin<br>OS = Mus musculus GN = Dnajc6 PE = 2 SV = 2                         | AUXI_MOUSE               | 102 kDa          | 1.87               | 2.34   | 4.64  |

Table S1. Cont.

| Protein Descriptions                                                                                         | Protein Name (Swissprot) | Molecular Weight | Quantitative Value |        |       |
|--------------------------------------------------------------------------------------------------------------|--------------------------|------------------|--------------------|--------|-------|
|                                                                                                              |                          |                  | 0 cGy              | 0.1 Gy | 4 Gy  |
| Pyridoxal kinase OS = Mus musculus GN = Pdxk<br>PE = 1 SV = 1                                                | PDXK_MOUSE               | 35 kDa           | 10.31              | 1.17   | 10.21 |
| Pyruvate carboxylase, mitochondrial OS = Mus musculus GN = Pc PE = 1 SV = 1                                  | PYC_MOUSE                | 130 kDa          | 3.75               | 7.01   | 7.43  |
| Pyruvate dehydrogenase E1 component subunit beta, mitochondrial OS = Mus musculus GN = Pdhb<br>PE = 1 SV = 1 | ODPB_MOUSE               | 39 kDa           | 7.50               | 7.01   | 6.50  |
| Pyruvate kinase isozymes M1/M2 OS = Mus musculus GN = Pkm PE = 1 SV = 4                                      | KPYM_MOUSE               | 58 kDa           | 21.56              | 33.88  | 19.50 |
| Rab GDP dissociation inhibitor alpha OS = Mus musculus GN = Gdi1 PE = 1 SV = 3                               | GDIA_MOUSE               | 51 kDa           | 11.25              | 5.84   | 7.43  |
| Rabphilin-3A OS = Mus musculus GN = Rph3a<br>PE = 1 SV = 2                                                   | RP3A_MOUSE               | 75 kDa           | 3.75               | 4.67   | 3.71  |
| RAC-gamma serine/threonine-protein kinase OS = Mus musculus GN = Akt3 PE = 1 SV = 1                          | AKT3_MOUSE               | 56 kDa           | 0.00               | 4.67   | 3.71  |
| Ras-related C3 botulinum toxin substrate 1 OS = Mus musculus GN = Rac1 PE = 1 SV = 1                         | RAC1_MOUSE               | 21 kDa           | 3.75               | 11.68  | 7.43  |
| Ras-related protein Rab-10 OS = Mus musculus GN = Rab10 PE = 1 SV = 1                                        | RAB10_MOUSE              | 23 kDa           | 1.87               | 2.34   | 2.79  |
| Ras-related protein Rab-21 OS = Mus musculus GN = Rab21 PE = 1 SV = 4                                        | RAB21_MOUSE              | 24 kDa           | 1.87               | 0.00   | 3.71  |
| Ras-related protein Rab-3A OS = Mus musculus GN = Rab3a PE = 1 SV = 1                                        | RAB3A_MOUSE              | 25 kDa           | 11.25              | 9.35   | 12.07 |
| Reticulon-4 OS = Mus musculus GN = Rtn4 PE = 1 SV = 2                                                        | RTN4_MOUSE               | 127 kDa          | 7.50               | 10.51  | 8.36  |
| Rho-related GTP-binding protein RhoB OS = Mus musculus GN = Rhob PE = 1 SV = 1                               | RHOB_MOUSE               | 22 kDa           | 6.56               | 9.35   | 9.28  |
| Ribosomal protein S6 kinase alpha-3 OS = Mus musculus GN = Rps6ka3 PE = 1 SV = 2                             | KS6A3_MOUSE              | 84 kDa           | 3.75               | 4.67   | 3.71  |
| Ryanodine receptor 2 OS = Mus musculus GN = Ryr2 PE = 1 SV = 1                                               | RYR2_MOUSE               | 565 kDa          | 3.75               | 1.17   | 5.57  |
| Saccharopine dehydrogenase-like oxidoreductase OS = Mus musculus GN = Sccpdh PE = 2 SV = 1                   | SCPDL_MOUSE              | 47 kDa           | 2.81               | 0.00   | 0.93  |
| Selenium-binding protein 1 OS = Mus musculus GN = Selenbp1 PE = 1 SV = 2                                     | SBP1_MOUSE (+1)          | 53 kDa           | 4.69               | 0.00   | 2.79  |
| Septin-11 OS = Mus musculus GN = Sept11 PE = 1 SV = 4                                                        | SEP11_MOUSE              | 50 kDa           | 1.87               | 0.00   | 4.64  |
| Septin-5 OS = Mus musculus GN = Sept5 PE = 1 SV = 2                                                          | SEPT5_MOUSE              | 43 kDa           | 1.87               | 4.67   | 6.50  |
| Septin-7 OS = Mus musculus GN = Sept7 PE = 1 SV = 1                                                          | SEPT7_MOUSE              | 51 kDa           | 1.87               | 2.34   | 3.71  |
| Serine racemase OS = Mus musculus GN = Srr PE = 1 SV = 1                                                     | SRR_MOUSE                | 36 kDa           | 3.75               | 0.00   | 3.71  |

Table S1. Cont.

| Protein Descriptions                                                                                                           | Protein Name (Swissprot) | Molecular Weight | Quantitative Value |        |       |
|--------------------------------------------------------------------------------------------------------------------------------|--------------------------|------------------|--------------------|--------|-------|
|                                                                                                                                |                          |                  | 0 cGy              | 0.1 Gy | 4 Gy  |
| Serine/threonine-protein kinase DCLK1 OS = Mus musculus GN = Dclk1 PE = 1 SV = 1                                               | DCLK1_MOUSE              | 84 kDa           | 2.81               | 0.00   | 4.64  |
| Serine/threonine-protein phosphatase 2A 65 kDa regulatory subunit A alpha isoform OS = Mus musculus GN = Ppp2r1a PE = 1 SV = 3 | 2AAA_MOUSE               | 65 kDa           | 7.50               | 7.01   | 8.36  |
| Serine/threonine-protein phosphatase 2B catalytic subunit alpha isoform OS = Mus musculus GN = Ppp3ca PE = 1 SV = 1            | PP2BA_MOUSE              | 59 kDa           | 18.75              | 26.87  | 18.57 |
| Serine/threonine-protein phosphatase PP1-alpha catalytic subunit OS = Mus musculus GN = Ppp1ca PE = 1 SV = 1                   | PP1A_MOUSE (+1)          | 38 kDa           | 4.69               | 18.69  | 3.71  |
| Serine--tRNA ligase, cytoplasmic OS = Mus musculus GN = Sars PE = 2 SV = 3                                                     | SYSC_MOUSE               | 58 kDa           | 2.81               | 2.34   | 1.86  |
| Serum albumin OS = Mus musculus GN = Alb PE = 1 SV = 3                                                                         | ALBU_MOUSE               | 69 kDa           | 17.81              | 11.68  | 15.78 |
| S-formylglutathione hydrolase OS = Mus musculus GN = Esd PE = 2 SV = 1                                                         | ESTD_MOUSE               | 31 kDa           | 17.81              | 14.02  | 12.07 |
| SH3-containing GRB2-like protein 3-interacting protein 1 OS = Mus musculus GN = Sgip1 PE = 1 SV = 1                            | SGIP1_MOUSE              | 86 kDa           | 5.62               | 2.34   | 3.71  |
| Sideroflexin-3 OS = Mus musculus GN = Sfxn3 PE = 1 SV = 1                                                                      | SFXN3_MOUSE              | 35 kDa           | 5.62               | 8.18   | 7.43  |
| Sideroflexin-5 OS = Mus musculus GN = Sfxn5 PE = 1 SV = 2                                                                      | SFXN5_MOUSE              | 37 kDa           | 5.62               | 7.01   | 8.36  |
| Small nuclear ribonucleoprotein Sm D3 OS = Mus musculus GN = Snrpd3 PE = 1 SV = 1                                              | SMD3_MOUSE               | 14 kDa           | 7.50               | 7.01   | 7.43  |
| Sodium- and chloride-dependent GABA transporter 3 OS = Mus musculus GN = Slc6a11 PE = 1 SV = 2                                 | S6A11_MOUSE (+1)         | 70 kDa           | 1.87               | 0.00   | 2.79  |
| Sodium/potassium-transporting ATPase subunit alpha-1 OS = Mus musculus GN = Atp1a1 PE = 1 SV = 1                               | AT1A1_MOUSE              | 113 kDa          | 6.56               | 2.34   | 6.50  |
| Sodium/potassium-transporting ATPase subunit alpha-2 OS = Mus musculus GN = Atp1a2 PE = 1 SV = 1                               | AT1A2_MOUSE              | 112 kDa          | 8.44               | 1.17   | 8.36  |
| Sodium/potassium-transporting ATPase subunit alpha-3 OS = Mus musculus GN = Atp1a3 PE = 1 SV = 1                               | AT1A3_MOUSE              | 112 kDa          | 28.12              | 14.02  | 35.28 |
| Sodium/potassium-transporting ATPase subunit beta-1 OS = Mus musculus GN = Atp1b1 PE = 1 SV = 1                                | AT1B1_MOUSE              | 35 kDa           | 25.31              | 120.32 | 20.43 |
| Sodium-dependent neutral amino acid transporter SLC6A17 OS = Mus musculus GN = Slc6a17 PE = 1 SV = 1                           | S6A17_MOUSE              | 81 kDa           | 7.50               | 9.35   | 8.36  |



Table S1. Cont.

| Protein Descriptions                                                                                                     | Protein Name (Swissprot) | Molecular Weight | Quantitative Value |        |       |
|--------------------------------------------------------------------------------------------------------------------------|--------------------------|------------------|--------------------|--------|-------|
|                                                                                                                          |                          |                  | 0 cGy              | 0.1 Gy | 4 Gy  |
| Sodium-driven chloride bicarbonate exchanger<br>OS = Mus musculus GN = Slc4a10 PE = 1 SV = 2                             | S4A10_MOUSE              | 126 kDa          | 3.75               | 5.84   | 4.64  |
| Solute carrier family 12 member 5 OS = Mus musculus<br>GN = Slc12a5 PE = 1 SV = 2                                        | S12A5_MOUSE              | 126 kDa          | 0.94               | 4.67   | 5.57  |
| Sorbin and SH3 domain-containing protein 1<br>OS = Mus musculus GN = Sorbs1 PE = 1 SV = 2                                | SRBS1_MOUSE              | 143 kDa          | 0.00               | 2.34   | 3.71  |
| Sorting and assembly machinery component 50<br>homolog OS = Mus musculus GN = Samm50 PE = 1<br>SV = 1                    | SAM50_MOUSE              | 52 kDa           | 1.87               | 5.84   | 1.86  |
| Spectrin alpha chain, brain OS = Mus musculus<br>GN = Sptan1 PE = 1 SV = 4                                               | SPTA2_MOUSE              | ?                | 36.56              | 31.54  | 38.06 |
| Spectrin beta chain, non-erythrocytic 1 OS = Mus musculus<br>GN = Sptbn1 PE = 1 SV = 2                                   | SPTB2_MOUSE              | 274 kDa          | 19.69              | 16.35  | 17.64 |
| Spliceosome RNA helicase Ddx39b OS = Mus musculus<br>GN = Ddx39b PE = 1 SV = 1                                           | DX39B_MOUSE              | 49 kDa           | 15.00              | 15.19  | 18.57 |
| Succinate dehydrogenase [ubiquinone] flavoprotein<br>subunit, mitochondrial OS = Mus musculus<br>GN = Sdha PE = 1 SV = 1 | DHSA_MOUSE               | 73 kDa           | 4.69               | 4.67   | 8.36  |
| Succinate dehydrogenase cytochrome b560 subunit,<br>mitochondrial OS = Mus musculus GN = Sdhc<br>PE = 2 SV = 1           | C560_MOUSE               | 18 kDa           | 4.69               | 5.84   | 3.71  |
| Succinyl-CoA ligase [ADP-forming] subunit beta,<br>mitochondrial OS = Mus musculus GN = Sucla2<br>PE = 1 SV = 2          | SUCB1_MOUSE              | 50 kDa           | 3.75               | 4.67   | 3.71  |
| Superoxide dismutase [Mn], mitochondrial<br>OS = Mus musculus GN = Sod2 PE = 1 SV = 3                                    | SODM_MOUSE               | 25 kDa           | 8.44               | 16.35  | 7.43  |
| Synapsin-1 OS = Mus musculus GN = Syn1 PE = 1<br>SV = 2                                                                  | SYN1_MOUSE               | 74 kDa           | 7.50               | 5.84   | 10.21 |
| Synapsin-2 OS = Mus musculus GN = Syn2 PE = 1<br>SV = 2                                                                  | SYN2_MOUSE               | 63 kDa           | 14.06              | 9.35   | 12.07 |
| Synaptic vesicle glycoprotein 2A OS = Mus musculus<br>GN = Sv2a PE = 1 SV = 1                                            | SV2A_MOUSE               | 83 kDa           | 9.37               | 18.69  | 7.43  |
| Synaptic vesicle glycoprotein 2B OS = Mus musculus<br>GN = Sv2b PE = 1 SV = 1                                            | SV2B_MOUSE               | 77 kDa           | 14.06              | 16.35  | 13.00 |
| Synaptojanin-1 OS = Mus musculus GN = Synj1<br>PE = 1 SV = 3                                                             | SYNJ1_MOUSE              | 173 kDa          | 3.75               | 4.67   | 3.71  |
| Synaptophysin OS = Mus musculus GN = Syp<br>PE = 1 SV = 2                                                                | SYPH_MOUSE               | 34 kDa           | 2.81               | 0.00   | 1.86  |
| Synaptotagmin-1 OS = Mus musculus GN = Syt1<br>PE = 1 SV = 1                                                             | SYT1_MOUSE               | 47 kDa           | 44.06              | 46.73  | 45.49 |
| Syntaxin-binding protein 1 OS = Mus musculus<br>GN = Stxbp1 PE = 1 SV = 2                                                | STXB1_MOUSE              | 68 kDa           | 9.37               | 21.03  | 13.93 |

Table S1. Cont.

| Protein Descriptions                                                                               | Protein Name (Swissprot) | Molecular Weight | Quantitative Value |        |        |
|----------------------------------------------------------------------------------------------------|--------------------------|------------------|--------------------|--------|--------|
|                                                                                                    |                          |                  | 0 cGy              | 0.1 Gy | 4 Gy   |
| T-complex protein 1 subunit beta OS = Mus musculus GN = Cct2 PE = 1 SV = 4                         | TCPB_MOUSE               | 57 kDa           | 1.87               | 2.34   | 2.79   |
| T-complex protein 1 subunit eta OS = Mus musculus GN = Cct7 PE = 1 SV = 1                          | TCPH_MOUSE               | 60 kDa           | 1.87               | 0.00   | 2.79   |
| T-complex protein 1 subunit theta OS = Mus musculus GN = Cct8 PE = 1 SV = 3                        | TCPQ_MOUSE               | 60 kDa           | 3.75               | 4.67   | 5.57   |
| Tenascin-R OS = Mus musculus GN = Tnr PE = 1 SV = 2                                                | TENR_MOUSE               | 150 kDa          | 7.50               | 10.51  | 13.00  |
| Thioredoxin-dependent peroxide reductase, mitochondrial OS = Mus musculus GN = Prdx3 PE = 1 SV = 1 | PRDX3_MOUSE              | 28 kDa           | 2.81               | 0.00   | 1.86   |
| Thy-1 membrane glycoprotein OS = Mus musculus GN = Thy1 PE = 1 SV = 1                              | THY1_MOUSE               | 18 kDa           | 19.69              | 28.04  | 24.14  |
| Toll-interacting protein OS = Mus musculus GN = Tollip PE = 1 SV = 1                               | TOLIP_MOUSE              | 30 kDa           | 2.81               | 2.34   | 3.71   |
| Transaldolase OS = Mus musculus GN = Taldo1 PE = 1 SV = 2                                          | TALDO_MOUSE              | 37 kDa           | 2.81               | 2.34   | 2.79   |
| Transforming protein RhoA OS = Mus musculus GN = Rhoa PE = 1 SV = 1                                | RHOA_MOUSE (+1)          | 22 kDa           | 10.31              | 15.19  | 17.64  |
| Transgelin OS = Mus musculus GN = Tagln PE = 1 SV = 3                                              | TAGL_MOUSE               | 23 kDa           | 4.69               | 1.17   | 2.79   |
| Transgelin-3 OS = Mus musculus GN = Tagln3 PE = 1 SV = 1                                           | TAGL3_MOUSE              | 22 kDa           | 1.87               | 0.00   | 3.71   |
| Trifunctional enzyme subunit beta, mitochondrial OS = Mus musculus GN = Hadhb PE = 1 SV = 1        | ECHB_MOUSE               | 51 kDa           | 2.81               | 2.34   | 1.86   |
| Triosephosphate isomerase OS = Mus musculus GN = Tpi1 PE = 1 SV = 4                                | TPIS_MOUSE               | 32 kDa           | 22.50              | 11.68  | 21.35  |
| Tubulin alpha-1A chain OS = Mus musculus GN = Tuba1a PE = 1 SV = 1                                 | TBA1A_MOUSE              | 50 kDa           | 114.36             | 110.97 | 115.12 |
| Tubulin alpha-1B chain OS = Mus musculus GN = Tuba1b PE = 1 SV = 2                                 | TBA1B_MOUSE              | 50 kDa           | 127.48             | 115.64 | 116.05 |
| Tubulin alpha-4A chain OS = Mus musculus GN = Tuba4a PE = 1 SV = 1                                 | TBA4A_MOUSE              | 50 kDa           | 119.99             | 110.97 | 112.34 |
| Tubulin beta-2A chain OS = Mus musculus GN = Tubb2a PE = 1 SV = 1                                  | TBB2A_MOUSE              | 50 kDa           | 218.41             | 212.60 | 126.26 |
| Tubulin beta-3 chain OS = Mus musculus GN = Tubb3 PE = 1 SV = 1                                    | TBB3_MOUSE               | 50 kDa           | 41.25              | 22.19  | 37.14  |
| Tubulin beta-4 chain OS = Mus musculus GN = Tubb4 PE = 1 SV = 3                                    | TBB4_MOUSE               | ?                | 222.16             | 195.08 | 113.26 |
| Twinfilin-1 OS = Mus musculus GN = Twf1 PE = 1 SV = 2                                              | TWF1_MOUSE               | 40 kDa           | 1.87               | 0.00   | 1.86   |
| Ubiquitin carboxyl-terminal hydrolase 5 OS = Mus musculus GN = Usp5 PE = 1 SV = 1                  | UBP5_MOUSE               | 96 kDa           | 3.75               | 1.17   | 3.71   |

Table S1. Cont.

| Protein Descriptions                                                                              | Protein Name (Swissprot) | Molecular Weight | Quantitative Value |        |       |
|---------------------------------------------------------------------------------------------------|--------------------------|------------------|--------------------|--------|-------|
|                                                                                                   |                          |                  | 0 cGy              | 0.1 Gy | 4 Gy  |
| Ubiquitin carboxyl-terminal hydrolase isozyme L1<br>OS = Mus musculus GN = Uchl1 PE = 1 SV = 1    | UCHL1_MOUSE              | 25 kDa           | 7.50               | 0.00   | 6.50  |
| Ubiquitin-conjugating enzyme E2 N OS = Mus musculus<br>GN = Ube2n PE = 1 SV = 1                   | UBE2N_MOUSE              | 17 kDa           | 3.75               | 2.34   | 3.71  |
| Ubiquitin-like modifier-activating enzyme 1<br>OS = Mus musculus GN = Uba1 PE = 1 SV = 1          | UBA1_MOUSE               | 118 kDa          | 7.50               | 10.51  | 7.43  |
| UMP-CMP kinase OS = Mus musculus<br>GN = Cmpk1 PE = 1 SV = 1                                      | KCY_MOUSE                | 22 kDa           | 1.87               | 2.34   | 3.71  |
| Vacuolar protein sorting-associated protein 26A<br>OS = Mus musculus GN = Vps26a PE = 2 SV = 1    | VP26A_MOUSE              | 38 kDa           | 5.62               | 4.67   | 6.50  |
| Vacuolar protein sorting-associated protein 35<br>OS = Mus musculus GN = Vps35 PE = 1 SV = 1      | VPS35_MOUSE              | 92 kDa           | 1.87               | 1.17   | 2.79  |
| Vesicle-fusing ATPase OS = Mus musculus<br>GN = Nsf PE = 1 SV = 2                                 | NSF_MOUSE                | 83 kDa           | 5.62               | 3.50   | 9.28  |
| Vimentin OS = Mus musculus GN = Vim PE = 1<br>SV = 3                                              | VIME_MOUSE               | 54 kDa           | 9.37               | 5.84   | 3.71  |
| Voltage-dependent anion-selective channel protein 1<br>OS = Mus musculus GN = Vdac1 PE = 1 SV = 3 | VDAC1_MOUSE              | 32 kDa           | 14.06              | 7.01   | 9.28  |
| Voltage-dependent anion-selective channel protein 2<br>OS = Mus musculus GN = Vdac2 PE = 1 SV = 2 | VDAC2_MOUSE              | 32 kDa           | 3.75               | 0.00   | 4.64  |
| Voltage-dependent anion-selective channel protein 3<br>OS = Mus musculus GN = Vdac3 PE = 1 SV = 1 | VDAC3_MOUSE              | 31 kDa           | 2.81               | 1.17   | 1.86  |
| V-type proton ATPase 116 kDa subunit a isoform 1<br>OS = Mus musculus GN = Atp6v0a1 PE = 1 SV = 3 | VPP1_MOUSE               | 96 kDa           | 16.87              | 16.35  | 21.35 |
| V-type proton ATPase catalytic subunit A OS = Mus musculus<br>GN = Atp6v1a PE = 1 SV = 2          | VATA_MOUSE               | 68 kDa           | 27.18              | 30.37  | 30.64 |
| V-type proton ATPase subunit B, brain isoform<br>OS = Mus musculus GN = Atp6v1b2 PE = 1 SV = 1    | VATB2_MOUSE              | 57 kDa           | 5.62               | 9.35   | 9.28  |
| V-type proton ATPase subunit C 1 OS = Mus musculus<br>GN = Atp6v1c1 PE = 1 SV = 4                 | VATC1_MOUSE              | 44 kDa           | 9.37               | 12.85  | 3.71  |
| V-type proton ATPase subunit E 1 OS = Mus musculus<br>GN = Atp6v1e1 PE = 1 SV = 2                 | VATE1_MOUSE (+1)         | 26 kDa           | 6.56               | 8.18   | 8.36  |
| V-type proton ATPase subunit H OS = Mus musculus<br>GN = Atp6v1h PE = 1 SV = 1                    | VATH_MOUSE               | 56 kDa           | 6.56               | 7.01   | 6.50  |
| WD repeat-containing protein 1 OS = Mus musculus<br>GN = Wdr1 PE = 1 SV = 3                       | WDR1_MOUSE               | 66 kDa           | 6.56               | 5.84   | 4.64  |
| WD repeat-containing protein 7 OS = Mus musculus<br>GN = Wdr7 PE = 1 SV = 3                       | WDR7_MOUSE               | 163 kDa          | 13.12              | 9.35   | 13.00 |

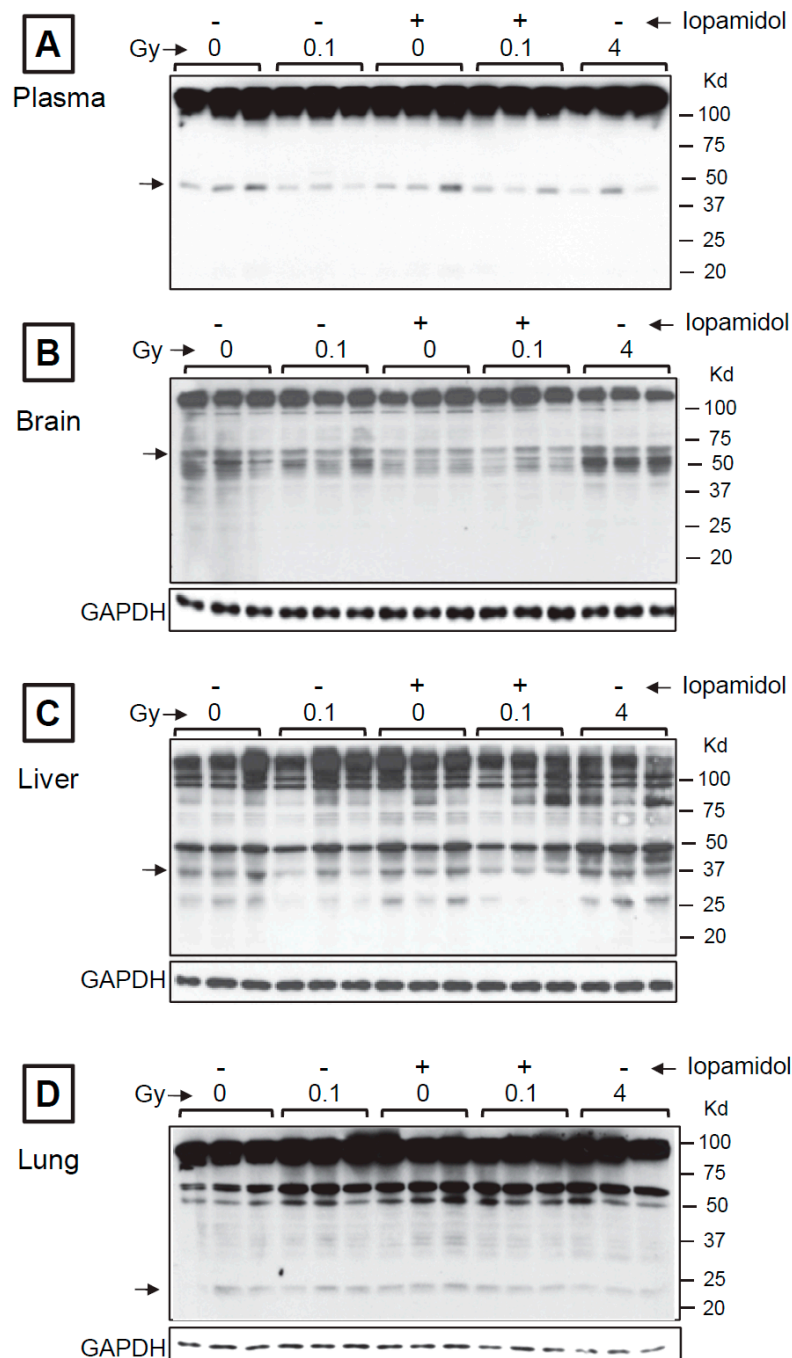

**Figure S1.** Modulation of global *S*-nitrosylation in organs of mice exposed to ionizing radiation in the presence or absence of iodine contrast agent. Western blot analyses, following biotin-switch assay, of nitrosylated proteins from plasma (A), brain (B), liver (C), and lung (D) of C57Bl/6J mice exposed 13 days earlier to  $^{137}\text{Cs}$   $\gamma$ -rays in presence (+) or absence (-) of iopamidol. Proteins from mouse organs were freshly extracted and subjected to the biotin switch assay. The biotinylated proteins were detected with anti-biotin antibody. Protein aliquots (15  $\mu\text{g}$ ), before enrichment, were used as input standard and the expression level of GAPDH was used as loading control. In case of plasma from circulating blood, staining of the membrane with Ponceau S Red (not shown) indicated equal loading.

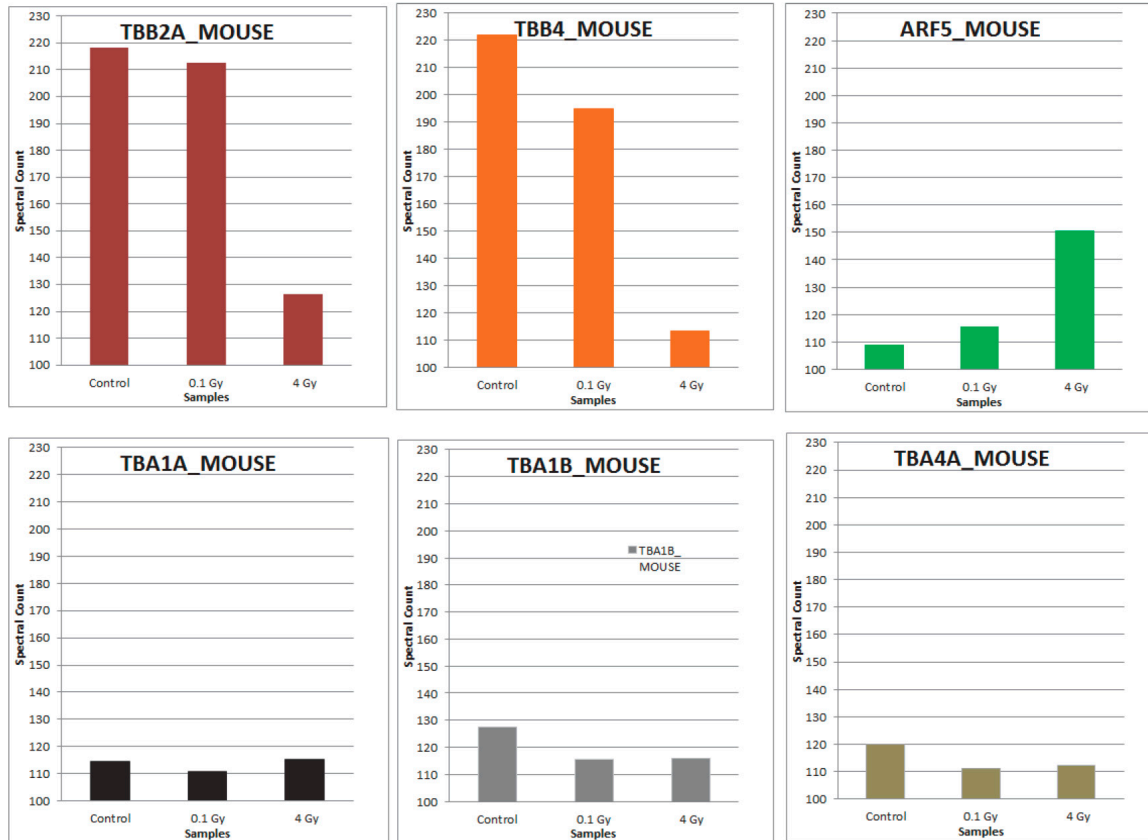

**Figure S2.** Differential effect of radiation dose on *S*-nitrosylation level. Bar chart comparisons of spectral counts of SNO proteins (proteins with spectral counts above 80) showing differential modulation in *S*-nitrosylation levels in brains of mice exposed to 0, 0.1 or 4 Gy of  $^{137}\text{Cs}$   $\gamma$ -rays.
